# Supplementary material for: Students Are Rarely Independent: When, Why, and How to Use Random Effects in Discipline-Based Education Research
Source: Atypon-hosted journal article supplement (doi:10.1187/cbe.17-12-0280), 2018-08-24
Supplement: cbe-cbe-17-12-0280-s02.csv [file cbe-cbe-17-12-0280-s02.csv]

StudentID	Treatment	Topic	Section	PreScore	PostScore
1	1	Q	B	3	2
10	1	Q	B	2	4
100	0	Q	A	2	1
100	1	R	A	1	5
101	0	R	B	6	7
101	1	S	B	5	6
102	1	S	B	4	6
102	0	R	B	6	6
103	0	S	A	2	8
103	0	Q	A	2	8
104	1	R	A	1	5
105	0	Q	A	0	2
105	0	S	A	3	4
106	0	Q	A	4	7
106	0	S	A	2	5
107	0	S	A	7	7
107	0	Q	A	6	7
108	1	S	B	6	8
109	1	S	B	3	4
109	0	R	B	6	7
11	1	Q	B	6	6
11	1	S	B	5	6
110	1	S	B	5	7
110	1	Q	B	8	8
111	0	Q	A	6	7
112	1	R	A	5	7
112	0	Q	A	5	5
113	1	R	A	3	1
114	1	Q	B	4	5
114	1	S	B	6	6
114	0	R	B	6	5
115	1	R	A	4	8
116	1	R	A	4	4
116	0	Q	A	5	5
116	0	S	A	8	8
117	0	S	A	6	6
118	0	S	A	6	8
118	0	Q	A	5	7
118	1	R	A	6	8
119	0	Q	A	3	7
119	0	S	A	1	6
12	1	R	A	1	3
120	1	S	B	1	7
120	0	R	B	4	1
121	1	S	B	7	7
122	0	S	A	4	5
122	1	R	A	6	4
123	1	R	A	3	4
123	0	S	A	5	5
123	0	Q	A	3	3
126	0	Q	A	6	8
126	0	S	A	7	8
127	0	R	B	5	5
127	1	S	B	2	5
128	0	Q	A	5	7
129	0	Q	A	1	5
129	1	R	A	4	3
13	0	Q	A	3	4
130	1	Q	B	2	5
130	1	S	B	5	6
132	0	Q	A	2	6
133	0	R	B	3	1
133	1	S	B	1	4
134	1	Q	B	5	5
134	0	R	B	1	6
136	1	S	B	5	6
136	1	Q	B	8	8
137	0	R	B	6	5
137	1	Q	B	3	5
137	1	S	B	4	6
138	1	R	A	2	5
139	0	S	A	1	1
139	0	Q	A	4	5
139	1	R	A	1	1
140	0	Q	A	4	1
141	0	Q	A	4	6
141	1	R	A	4	5
141	0	S	A	5	8
143	0	S	A	1	3
143	0	Q	A	2	0
144	0	Q	A	6	7
144	1	R	A	7	7
144	0	S	A	7	7
145	1	Q	B	6	6
146	0	R	B	3	4
146	1	Q	B	2	8
147	0	R	B	6	7
147	1	Q	B	4	7
148	0	R	B	4	6
149	0	S	A	3	5
149	0	Q	A	2	5
15	1	S	B	3	4
15	1	Q	B	8	6
150	1	S	B	7	7
150	0	R	B	2	4
151	1	S	B	6	8
151	1	Q	B	1	6
152	0	S	A	2	5
152	0	Q	A	5	6
153	1	R	A	2	1
153	0	S	A	2	4
154	0	Q	A	0	5
154	1	R	A	4	6
156	1	S	B	7	8
156	0	R	B	5	6
157	1	R	A	1	6
158	1	Q	B	0	2
158	0	R	B	1	0
159	0	R	B	4	6
159	1	S	B	2	2
160	0	S	A	6	3
160	1	R	A	5	5
162	1	S	B	5	5
162	1	Q	B	6	8
163	1	Q	B	0	4
163	1	S	B	3	5
164	0	Q	A	5	8
164	0	S	A	4	6
165	1	S	B	3	6
166	0	S	A	1	2
166	1	R	A	2	3
167	0	Q	A	3	1
168	1	R	A	4	4
169	1	Q	B	2	5
169	0	R	B	3	5
17	1	R	A	2	5
17	0	S	A	3	7
170	1	S	B	4	5
170	1	Q	B	3	3
171	1	R	A	2	4
171	0	Q	A	4	5
171	0	S	A	4	3
172	0	R	B	1	4
172	1	Q	B	1	2
173	0	S	A	3	4
173	1	R	A	3	7
174	0	Q	A	5	8
175	1	R	A	5	6
175	0	Q	A	4	6
175	0	S	A	6	8
176	0	S	A	4	4
177	0	R	B	4	6
177	1	Q	B	6	8
178	0	Q	A	4	5
178	0	S	A	3	7
178	1	R	A	1	6
179	0	Q	A	6	7
179	1	R	A	3	6
179	0	S	A	6	6
180	1	S	B	3	3
180	1	Q	B	2	4
180	0	R	B	5	4
181	0	S	A	4	7
181	0	Q	A	4	4
182	1	R	A	5	5
183	1	R	A	3	5
183	0	Q	A	6	5
184	1	S	B	4	6
184	1	Q	B	5	5
185	0	R	B	4	4
186	0	S	A	5	8
186	0	Q	A	6	5
186	1	R	A	4	7
187	1	S	B	6	8
187	0	R	B	2	1
188	1	S	B	5	6
189	0	S	A	4	6
189	1	R	A	4	7
19	1	Q	B	7	8
19	0	R	B	6	6
19	1	S	B	5	8
190	0	S	A	3	1
191	1	S	B	2	1
191	0	R	B	5	4
191	1	Q	B	1	0
192	0	S	A	2	3
193	1	R	A	3	3
195	1	S	B	5	8
195	0	R	B	6	5
195	1	Q	B	6	7
196	1	R	A	3	3
197	0	R	B	8	8
197	1	S	B	6	6
198	0	S	A	6	7
200	0	Q	A	5	6
200	1	R	A	4	5
201	1	R	A	4	6
201	0	S	A	6	7
202	1	Q	B	4	3
202	1	S	B	4	3
203	1	S	B	3	7
203	1	Q	B	5	0
203	0	R	B	4	1
204	0	S	A	1	1
205	0	Q	A	3	7
205	1	R	A	4	6
206	0	S	A	7	5
207	1	R	A	2	4
207	0	Q	A	1	7
208	0	Q	A	3	8
209	1	Q	B	0	2
210	0	S	A	6	7
210	1	R	A	6	8
211	1	S	B	1	2
211	0	R	B	5	5
212	0	R	B	4	5
212	1	Q	B	7	8
213	0	Q	A	4	6
214	1	S	B	2	5
214	1	Q	B	3	3
215	0	S	A	3	5
215	0	Q	A	4	5
216	0	S	A	4	5
216	1	R	A	5	7
217	0	S	A	7	8
218	0	R	B	5	6
218	1	S	B	4	5
219	0	S	A	6	7
219	1	R	A	6	5
219	0	Q	A	5	8
220	0	S	A	6	8
220	0	Q	A	3	4
221	0	R	B	5	6
221	1	Q	B	6	7
222	0	S	A	2	5
222	1	R	A	4	4
223	1	S	B	5	3
223	1	Q	B	2	4
224	1	S	B	4	7
224	1	Q	B	7	6
225	1	R	A	5	3
226	1	R	A	1	3
226	0	S	A	5	6
227	0	R	B	1	4
228	1	Q	B	4	6
228	0	R	B	4	5
229	0	R	B	6	5
230	0	Q	A	7	8
231	1	R	A	4	8
231	0	Q	A	6	6
231	0	S	A	6	7
232	0	S	A	8	8
232	0	Q	A	8	8
233	1	Q	B	7	7
233	0	R	B	5	6
234	0	S	A	4	7
234	0	Q	A	6	7
235	1	R	A	2	2
235	0	S	A	5	7
235	0	Q	A	1	4
236	1	S	B	1	4
237	1	Q	B	5	7
237	1	S	B	2	6
238	1	Q	B	4	6
238	1	S	B	7	7
239	1	S	B	6	3
239	1	Q	B	1	2
239	0	R	B	3	2
240	1	Q	B	6	5
240	1	S	B	4	5
242	0	S	A	1	1
243	1	S	B	5	4
243	1	Q	B	4	7
244	1	Q	B	3	5
244	0	R	B	2	4
245	1	S	B	3	6
246	1	R	A	4	1
246	0	Q	A	4	3
247	0	S	A	3	1
248	0	Q	A	7	6
249	0	R	B	3	3
249	1	Q	B	2	3
251	1	R	A	4	5
251	0	S	A	5	6
252	0	S	A	5	8
252	1	R	A	4	3
253	1	R	A	3	5
253	0	Q	A	3	3
253	0	S	A	1	3
254	0	Q	A	2	4
254	0	S	A	5	7
255	0	Q	A	3	2
255	0	S	A	2	1
255	1	R	A	2	3
256	0	S	A	3	7
256	1	R	A	6	6
257	0	Q	A	3	4
257	0	S	A	6	8
258	0	S	A	4	8
258	0	Q	A	4	5
258	1	R	A	2	5
259	0	R	B	3	3
26	0	R	B	7	8
26	1	Q	B	6	7
261	1	S	B	3	2
262	1	R	A	4	7
262	0	S	A	3	5
263	0	S	A	3	5
264	1	R	A	2	4
264	0	Q	A	7	8
265	0	Q	A	3	3
265	1	R	A	6	5
265	0	S	A	6	8
266	1	S	B	5	5
266	0	R	B	1	5
267	1	Q	B	4	6
268	1	Q	B	1	6
27	1	Q	B	6	7
27	1	S	B	7	7
270	0	Q	A	3	3
270	1	R	A	0	6
271	0	R	B	5	7
271	1	S	B	6	7
272	0	Q	A	2	5
273	1	R	A	4	2
273	0	Q	A	4	3
274	1	R	A	1	4
274	0	S	A	1	3
275	0	Q	A	3	3
275	1	R	A	3	4
276	0	S	A	4	7
276	0	Q	A	4	7
277	1	S	B	3	5
277	0	R	B	4	4
278	1	R	A	2	7
279	0	R	B	2	5
279	1	Q	B	4	5
28	0	Q	A	8	7
28	0	S	A	4	6
28	1	R	A	4	6
280	0	Q	A	1	5
280	1	R	A	6	5
281	1	S	B	5	4
281	1	Q	B	3	5
282	1	S	B	5	6
283	1	S	B	3	5
283	0	R	B	3	3
284	0	Q	A	6	7
284	0	S	A	4	6
285	1	R	A	1	6
285	0	S	A	7	6
286	1	Q	B	2	2
287	1	S	B	5	3
287	1	Q	B	2	6
288	0	S	A	5	7
289	1	R	A	1	1
289	0	S	A	3	4
29	0	S	A	3	5
29	0	Q	A	5	3
290	0	R	B	3	6
290	1	S	B	5	6
291	0	Q	A	3	4
291	1	R	A	3	6
292	1	R	A	1	4
292	0	Q	A	3	4
293	1	S	B	1	2
293	1	Q	B	1	2
294	0	S	A	5	2
296	1	S	B	1	5
296	0	R	B	1	5
298	1	Q	B	4	2
298	1	S	B	1	2
299	1	S	B	5	6
299	0	R	B	5	3
3	0	Q	A	5	7
3	0	S	A	5	6
300	1	R	A	5	5
300	0	Q	A	6	8
300	0	S	A	5	6
302	0	Q	A	5	8
302	1	R	A	5	6
303	1	Q	B	7	7
303	1	S	B	6	8
304	1	S	B	4	7
304	0	R	B	3	5
305	0	Q	A	6	4
306	0	Q	A	4	6
306	1	R	A	3	5
306	0	S	A	5	6
307	0	Q	A	4	6
307	1	R	A	6	6
307	0	S	A	6	6
309	1	S	B	4	7
309	0	R	B	2	1
309	1	Q	B	3	7
31	0	R	B	3	1
310	0	Q	A	5	7
310	0	S	A	5	4
310	1	R	A	4	6
311	0	S	A	8	6
312	0	Q	A	5	8
312	1	R	A	4	2
315	1	S	B	6	6
315	1	Q	B	5	7
316	1	R	A	6	6
316	0	S	A	5	6
316	0	Q	A	6	6
317	0	Q	A	6	8
318	0	S	A	7	6
318	0	Q	A	4	6
318	1	R	A	2	6
319	0	Q	A	3	5
32	0	R	B	2	3
320	0	Q	A	7	7
320	1	R	A	5	6
321	1	S	B	4	3
321	0	R	B	5	6
322	0	S	A	4	4
322	0	Q	A	6	7
323	0	S	A	6	2
323	0	Q	A	5	4
323	1	R	A	4	3
324	0	Q	A	6	7
324	1	R	A	6	7
325	1	Q	B	5	6
325	0	R	B	2	8
327	0	Q	A	3	5
327	0	S	A	6	6
328	1	Q	B	4	8
329	0	Q	A	3	7
329	0	S	A	3	7
329	1	R	A	5	6
33	1	S	B	4	2
330	0	S	A	8	7
331	0	R	B	5	6
333	0	S	A	5	7
333	0	Q	A	3	5
333	1	R	A	4	3
334	1	R	A	6	6
334	0	Q	A	8	7
335	0	R	B	2	4
336	0	Q	A	3	5
336	1	R	A	0	4
338	1	S	B	5	8
34	0	R	B	2	3
34	1	S	B	2	1
34	1	Q	B	1	2
340	1	R	A	4	6
340	0	Q	A	1	4
341	0	Q	A	5	7
341	0	S	A	6	8
342	1	S	B	4	5
342	1	Q	B	5	7
343	1	R	A	5	5
343	0	S	A	3	5
343	0	Q	A	6	7
344	0	Q	A	3	3
345	1	R	A	7	8
345	0	S	A	5	7
346	0	S	A	5	6
348	0	S	A	4	6
348	1	R	A	5	1
349	1	Q	B	6	7
349	1	S	B	5	8
349	0	R	B	5	5
35	1	S	B	1	7
350	1	S	B	3	1
350	0	R	B	3	5
351	0	Q	A	4	1
351	1	R	A	2	6
352	1	R	A	7	7
353	0	R	B	4	0
353	1	Q	B	1	8
354	1	Q	B	7	6
354	0	R	B	4	4
354	1	S	B	6	7
355	1	S	B	4	5
356	1	Q	B	5	5
356	1	S	B	6	7
356	0	R	B	2	1
357	0	R	B	2	6
358	1	S	B	4	7
359	1	Q	B	3	6
359	0	R	B	5	5
36	0	R	B	2	4
36	1	S	B	3	1
36	1	Q	B	2	1
360	1	R	A	1	2
360	0	Q	A	0	4
360	0	S	A	5	7
362	0	R	B	4	5
362	1	Q	B	2	5
362	1	S	B	2	6
363	0	Q	A	6	7
363	1	R	A	5	4
363	0	S	A	4	5
364	1	Q	B	4	2
364	1	S	B	1	3
365	1	R	A	7	7
366	1	Q	B	4	6
367	0	Q	A	5	8
367	0	S	A	4	3
368	0	S	A	2	4
368	1	R	A	4	4
368	0	Q	A	1	1
37	0	S	A	3	8
37	1	R	A	5	5
370	0	S	A	3	2
371	0	Q	A	1	4
372	1	R	A	2	5
372	0	Q	A	4	5
373	0	R	B	3	4
373	1	S	B	2	5
374	1	R	A	5	6
374	0	Q	A	3	4
374	0	S	A	4	7
375	1	R	A	6	6
376	0	S	A	5	2
376	0	Q	A	2	5
378	0	R	B	3	5
378	1	Q	B	6	7
378	1	S	B	5	6
379	1	R	A	4	6
38	0	R	B	6	4
38	1	S	B	4	6
38	1	Q	B	4	6
380	1	S	B	4	8
381	0	S	A	6	7
381	1	R	A	5	7
382	1	S	B	6	3
382	1	Q	B	2	3
383	1	Q	B	4	6
383	0	R	B	5	4
386	1	S	B	1	7
387	1	S	B	1	4
387	1	Q	B	4	7
388	0	Q	A	3	6
388	1	R	A	4	7
389	0	R	B	2	6
389	1	S	B	3	8
39	1	Q	B	1	5
39	0	R	B	2	4
390	0	Q	A	1	6
391	1	Q	B	5	6
391	0	R	B	5	5
392	1	Q	B	3	4
392	1	S	B	6	5
392	0	R	B	0	2
393	0	Q	A	4	5
394	1	Q	B	1	1
394	1	S	B	1	1
394	0	R	B	2	3
395	0	Q	A	6	7
395	0	S	A	6	8
396	0	R	B	2	3
396	1	Q	B	4	5
397	0	R	B	7	5
398	0	R	B	4	5
398	1	S	B	4	4
399	1	R	A	6	6
40	1	Q	B	6	8
400	0	R	B	6	6
400	1	S	B	2	5
401	0	S	A	7	8
401	1	R	A	6	6
401	0	Q	A	6	6
402	0	R	B	4	4
403	1	S	B	4	6
403	1	Q	B	5	5
403	0	R	B	5	2
404	1	R	A	6	6
404	0	Q	A	6	6
404	0	S	A	4	7
405	1	S	B	5	8
405	0	R	B	3	5
406	1	R	A	2	5
406	0	S	A	3	6
407	1	Q	B	2	6
407	1	S	B	2	6
408	0	R	B	1	3
408	1	Q	B	3	4
409	0	Q	A	2	1
409	0	S	A	3	4
409	1	R	A	1	6
41	1	R	A	5	6
41	0	Q	A	3	7
411	0	S	A	3	3
411	1	R	A	5	4
412	0	R	B	7	6
412	1	S	B	6	6
413	0	Q	A	6	6
413	1	R	A	3	5
414	0	R	B	1	4
414	1	S	B	5	7
415	0	R	B	4	4
416	1	Q	B	1	4
416	0	R	B	1	5
416	1	S	B	2	1
417	0	S	A	6	6
418	0	Q	A	3	7
418	0	S	A	6	8
418	1	R	A	5	8
419	1	S	B	1	2
419	1	Q	B	5	6
42	0	R	B	3	1
42	1	S	B	2	0
42	1	Q	B	0	0
421	0	R	B	3	6
421	1	Q	B	4	6
421	1	S	B	5	4
422	1	Q	B	2	5
422	0	R	B	3	4
422	1	S	B	4	1
423	1	Q	B	4	7
423	1	S	B	6	7
423	0	R	B	6	7
424	1	Q	B	2	3
427	0	S	A	0	5
427	1	R	A	2	2
427	0	Q	A	2	2
428	1	R	A	6	6
428	0	Q	A	5	7
428	0	S	A	4	8
429	0	R	B	3	5
429	1	Q	B	5	8
43	1	Q	B	6	7
43	1	S	B	5	7
430	1	S	B	2	3
430	1	Q	B	1	5
431	1	S	B	1	7
432	0	Q	A	5	4
432	1	R	A	0	3
432	0	S	A	1	1
433	0	S	A	5	6
433	0	Q	A	4	5
434	0	S	A	3	6
434	0	Q	A	4	4
435	0	Q	A	3	7
435	0	S	A	6	6
436	1	S	B	7	8
436	1	Q	B	5	7
437	1	Q	B	4	6
437	0	R	B	4	5
438	0	R	B	4	6
438	1	Q	B	5	7
439	1	R	A	5	6
439	0	S	A	4	7
440	0	R	B	4	4
440	1	S	B	6	8
441	0	S	A	4	1
441	0	Q	A	6	6
442	1	R	A	1	3
442	0	Q	A	4	5
442	0	S	A	4	6
443	0	Q	A	6	7
443	0	S	A	4	7
446	0	Q	A	5	7
446	1	R	A	6	6
447	0	R	B	5	1
448	1	S	B	4	6
448	1	Q	B	4	7
448	0	R	B	3	6
45	1	R	A	5	5
450	1	R	A	1	1
451	0	S	A	6	7
451	0	Q	A	5	6
451	1	R	A	4	5
452	0	R	B	6	6
452	1	Q	B	6	8
452	1	S	B	3	7
453	1	Q	B	3	3
453	0	R	B	2	4
454	1	Q	B	7	8
455	0	Q	A	1	1
455	1	R	A	1	2
456	0	S	A	4	6
457	0	S	A	4	4
457	1	R	A	5	4
458	1	R	A	0	5
459	1	R	A	5	1
459	0	Q	A	5	5
459	0	S	A	6	8
46	1	Q	B	2	4
46	1	S	B	5	3
46	0	R	B	0	4
460	0	Q	A	4	6
460	1	R	A	3	6
461	0	S	A	6	7
462	0	R	B	2	1
462	1	S	B	1	1
462	1	Q	B	3	3
463	0	Q	A	4	2
464	1	Q	B	7	7
464	1	S	B	7	8
465	1	Q	B	3	4
465	0	R	B	4	6
465	1	S	B	5	6
466	0	R	B	3	4
466	1	S	B	6	7
466	1	Q	B	6	5
467	0	R	B	5	6
468	0	Q	A	3	2
468	1	R	A	4	4
468	0	S	A	5	3
469	0	S	A	5	6
469	0	Q	A	4	6
47	0	R	B	3	4
47	1	S	B	4	8
470	1	Q	B	7	7
470	1	S	B	6	6
471	1	S	B	2	7
471	0	R	B	4	7
471	1	Q	B	5	7
472	0	Q	A	3	2
473	1	R	A	7	7
473	0	S	A	6	8
474	0	Q	A	5	6
474	1	R	A	4	1
475	0	Q	A	4	5
475	0	S	A	6	6
476	0	Q	A	3	2
476	0	S	A	2	4
477	0	Q	A	6	7
477	1	R	A	5	5
477	0	S	A	7	8
479	0	R	B	1	3
480	0	R	B	5	6
480	1	Q	B	6	7
480	1	S	B	5	5
481	1	Q	B	5	8
482	0	S	A	8	7
482	0	Q	A	5	8
482	1	R	A	5	7
483	1	S	B	4	5
484	0	Q	A	5	3
484	0	S	A	5	6
485	0	S	A	5	6
485	1	R	A	5	4
486	0	S	A	1	1
486	1	R	A	3	6
487	1	S	B	3	5
488	0	Q	A	6	5
488	1	R	A	3	2
488	0	S	A	3	4
49	0	Q	A	4	7
49	1	R	A	5	7
49	0	S	A	3	7
490	1	Q	B	5	8
491	0	Q	A	6	5
491	1	R	A	4	5
491	0	S	A	5	4
492	0	S	A	4	5
492	1	R	A	5	6
493	0	S	A	4	5
493	1	R	A	3	5
493	0	Q	A	4	4
495	1	S	B	3	6
495	0	R	B	4	5
496	1	S	B	1	1
497	1	Q	B	8	8
497	1	S	B	6	7
498	0	R	B	4	6
498	1	S	B	7	8
499	1	S	B	3	8
499	0	R	B	4	5
499	1	Q	B	3	7
50	0	R	B	6	7
50	1	Q	B	8	8
500	1	R	A	4	6
500	0	S	A	7	7
501	0	S	A	4	7
501	1	R	A	4	5
501	0	Q	A	7	7
502	1	R	A	3	1
503	0	Q	A	2	2
503	0	S	A	4	6
505	1	S	B	4	6
505	1	Q	B	5	5
506	0	R	B	2	2
507	0	Q	A	5	7
507	0	S	A	3	3
508	0	R	B	3	6
508	1	S	B	5	4
509	0	S	A	6	6
51	1	S	B	2	6
51	1	Q	B	3	5
51	0	R	B	5	3
510	0	S	A	2	4
510	0	Q	A	6	4
511	0	R	B	6	7
511	1	Q	B	5	7
512	1	R	A	4	3
512	0	S	A	1	1
513	0	R	B	6	5
514	0	R	B	4	5
514	1	Q	B	6	7
515	0	R	B	3	5
515	1	Q	B	1	6
516	1	R	A	1	6
516	0	Q	A	6	6
516	0	S	A	4	3
517	0	Q	A	3	4
517	1	R	A	2	7
518	1	Q	B	7	8
519	1	R	A	6	5
519	0	S	A	3	7
519	0	Q	A	4	7
520	0	S	A	2	2
520	0	Q	A	3	2
521	0	Q	A	3	8
521	0	S	A	4	6
522	1	R	A	3	4
522	0	S	A	4	8
523	1	R	A	0	3
524	0	Q	A	2	8
524	0	S	A	5	8
525	0	S	A	5	6
525	0	Q	A	6	7
526	1	S	B	3	7
526	0	R	B	4	7
527	1	R	A	4	5
527	0	Q	A	6	6
528	0	S	A	3	5
529	0	R	B	5	5
529	1	Q	B	4	7
53	0	Q	A	4	4
53	1	R	A	4	6
530	1	Q	B	7	8
530	1	S	B	6	7
531	1	Q	B	4	7
532	0	R	B	3	2
532	1	Q	B	1	2
532	1	S	B	1	2
533	1	R	A	3	5
533	0	Q	A	5	6
534	0	R	B	2	3
535	1	R	A	2	7
535	0	Q	A	7	8
536	1	S	B	0	5
536	0	R	B	3	4
537	0	S	A	6	6
537	0	Q	A	2	6
537	1	R	A	3	6
538	1	Q	B	6	7
539	0	R	B	1	3
539	1	Q	B	1	1
54	0	Q	A	3	3
540	1	Q	B	4	4
541	1	S	B	3	3
542	0	Q	A	5	7
542	0	S	A	6	7
543	0	Q	A	0	5
544	1	Q	B	3	7
544	1	S	B	2	5
545	0	S	A	5	8
545	1	R	A	4	6
546	1	S	B	4	2
547	0	S	A	7	4
547	0	Q	A	4	3
549	1	R	A	4	4
549	0	S	A	5	6
55	0	R	B	7	8
55	1	S	B	1	8
550	0	Q	A	4	5
550	0	S	A	6	4
551	1	Q	B	3	5
552	1	R	A	5	1
552	0	S	A	3	3
554	0	Q	A	2	6
554	0	S	A	5	7
556	0	Q	A	3	5
556	0	S	A	6	6
556	1	R	A	3	4
558	1	S	B	7	8
558	1	Q	B	7	7
558	0	R	B	4	6
559	1	R	A	0	1
56	1	Q	B	3	3
56	1	S	B	2	3
560	0	S	A	1	1
560	1	R	A	4	5
560	0	Q	A	1	1
561	1	R	A	6	4
562	0	R	B	3	5
562	1	Q	B	2	3
563	0	R	B	1	3
564	1	S	B	7	5
564	0	R	B	4	4
565	0	R	B	5	5
565	1	Q	B	3	4
565	1	S	B	6	8
566	0	R	B	5	4
567	0	S	A	6	6
568	1	R	A	1	2
569	1	R	A	2	5
569	0	S	A	6	6
57	1	S	B	2	3
57	0	R	B	3	3
57	1	Q	B	1	2
570	1	Q	B	5	5
572	0	Q	A	2	5
572	0	S	A	3	5
572	1	R	A	0	3
573	0	S	A	4	2
576	1	R	A	6	6
576	0	Q	A	8	8
577	1	R	A	5	6
578	0	S	A	2	3
578	0	Q	A	1	5
579	0	R	B	4	5
579	1	Q	B	4	7
58	1	S	B	2	3
580	1	R	A	2	2
581	1	R	A	3	5
582	1	S	B	2	3
582	0	R	B	1	3
583	1	S	B	4	8
583	0	R	B	5	6
583	1	Q	B	7	8
584	0	R	B	2	5
584	1	Q	B	3	5
585	1	S	B	2	4
585	1	Q	B	1	0
587	0	Q	A	4	1
587	0	S	A	3	6
588	1	Q	B	5	7
588	0	R	B	1	6
589	0	S	A	4	5
589	0	Q	A	4	6
59	1	S	B	4	3
59	0	R	B	4	6
590	0	R	B	4	5
590	1	S	B	4	5
592	1	R	A	7	7
592	0	Q	A	6	7
592	0	S	A	7	7
593	0	Q	A	4	4
593	0	S	A	3	4
594	1	Q	B	3	5
594	1	S	B	2	8
595	1	R	A	4	6
595	0	Q	A	5	5
596	0	Q	A	2	6
596	1	R	A	6	3
598	0	R	B	7	6
599	0	S	A	3	8
599	0	Q	A	6	8
6	1	Q	B	3	4
6	0	R	B	2	3
6	1	S	B	1	5
600	1	S	B	7	7
600	1	Q	B	6	8
600	0	R	B	7	7
601	0	S	A	3	7
602	1	S	B	5	3
602	0	R	B	3	4
603	1	Q	B	6	6
603	0	R	B	6	5
603	1	S	B	5	6
604	1	R	A	3	2
605	1	R	A	1	6
605	0	S	A	5	2
606	1	S	B	6	7
606	0	R	B	3	4
607	1	R	A	3	4
608	0	R	B	3	4
608	1	S	B	4	2
609	0	S	A	2	5
609	0	Q	A	4	7
610	1	Q	B	7	8
610	0	R	B	4	7
611	1	R	A	4	5
611	0	S	A	2	2
611	0	Q	A	2	4
612	1	Q	B	7	8
612	1	S	B	5	8
613	1	S	B	1	4
613	1	Q	B	3	8
613	0	R	B	4	6
614	0	R	B	5	6
615	1	S	B	3	4
616	1	R	A	4	5
616	0	Q	A	5	7
619	1	Q	B	6	3
62	0	R	B	4	7
621	0	R	B	2	7
621	1	S	B	5	5
622	0	R	B	6	5
622	1	S	B	4	6
623	1	R	A	2	4
623	0	S	A	4	3
623	0	Q	A	5	6
624	1	Q	B	7	8
624	1	S	B	7	7
624	0	R	B	4	5
625	0	Q	A	2	4
627	0	R	B	2	5
627	1	S	B	6	7
628	0	S	A	5	8
628	1	R	A	3	6
629	1	R	A	2	3
629	0	Q	A	3	1
63	0	Q	A	6	5
630	0	Q	A	3	5
631	1	Q	B	6	8
631	0	R	B	4	6
631	1	S	B	5	7
632	0	R	B	5	5
632	1	Q	B	1	3
633	1	R	A	4	6
633	0	Q	A	4	4
634	1	S	B	5	7
635	1	R	A	3	8
636	1	R	A	3	6
636	0	Q	A	6	8
637	0	S	A	3	4
637	1	R	A	3	4
638	1	Q	B	1	2
638	1	S	B	4	1
639	0	S	A	3	7
639	0	Q	A	1	6
64	0	S	A	3	2
640	0	R	B	6	6
641	0	Q	A	3	6
641	0	S	A	6	6
642	0	R	B	4	5
642	1	S	B	1	3
643	0	S	A	1	1
643	0	Q	A	0	3
644	0	S	A	5	8
644	0	Q	A	6	8
645	1	R	A	5	1
645	0	S	A	1	1
646	1	Q	B	3	7
647	1	S	B	4	7
647	1	Q	B	6	6
648	1	R	A	2	3
649	0	S	A	2	1
649	0	Q	A	3	3
65	0	S	A	7	7
65	1	R	A	3	5
651	1	Q	B	3	2
652	1	Q	B	1	6
652	1	S	B	6	8
653	0	R	B	4	4
654	0	R	B	4	4
654	1	S	B	3	4
655	1	S	B	6	7
655	1	Q	B	1	4
655	0	R	B	6	6
656	0	S	A	1	6
657	1	S	B	4	5
657	0	R	B	5	4
657	1	Q	B	5	7
658	0	R	B	0	2
658	1	S	B	3	2
658	1	Q	B	0	2
659	0	S	A	4	2
659	1	R	A	1	1
660	1	Q	B	1	1
661	1	Q	B	1	1
661	1	S	B	1	2
661	0	R	B	1	2
662	0	R	B	4	4
663	1	S	B	1	3
663	0	R	B	4	4
664	1	Q	B	5	7
664	0	R	B	6	8
665	1	R	A	6	6
665	0	Q	A	6	7
666	1	S	B	6	5
666	1	Q	B	5	6
666	0	R	B	4	3
667	1	Q	B	1	6
667	0	R	B	1	2
668	1	R	A	4	6
668	0	Q	A	5	6
669	1	Q	B	2	3
669	1	S	B	2	4
67	0	R	B	2	4
670	0	S	A	1	2
670	1	R	A	1	4
670	0	Q	A	6	4
671	0	Q	A	7	8
671	1	R	A	3	5
672	0	Q	A	1	1
673	1	R	A	2	4
673	0	S	A	5	3
674	0	R	B	5	6
674	1	Q	B	5	5
675	0	S	A	3	2
675	1	R	A	5	5
676	0	R	B	3	1
676	1	S	B	4	4
677	1	S	B	6	8
678	1	Q	B	3	1
679	0	S	A	4	1
679	1	R	A	1	4
68	1	S	B	2	6
68	1	Q	B	3	6
681	0	Q	A	3	7
681	0	S	A	1	7
683	1	S	B	8	8
683	0	R	B	3	5
684	1	Q	B	6	7
684	0	R	B	5	7
685	1	R	A	2	4
685	0	Q	A	2	3
686	0	R	B	5	5
686	1	Q	B	4	7
687	1	R	A	1	3
687	0	Q	A	2	4
688	1	Q	B	4	2
688	1	S	B	4	2
689	0	Q	A	6	7
69	0	R	B	1	6
690	1	S	B	2	6
690	1	Q	B	1	4
691	0	R	B	3	3
691	1	S	B	2	5
692	0	R	B	3	5
692	1	Q	B	3	5
692	1	S	B	2	5
693	1	S	B	4	5
695	1	S	B	2	5
696	0	Q	A	5	3
696	1	R	A	1	4
697	1	Q	B	1	4
697	0	R	B	4	5
698	1	Q	B	1	6
698	0	R	B	2	2
699	1	R	A	5	8
699	0	S	A	4	7
699	0	Q	A	6	7
7	1	R	A	6	7
7	0	Q	A	6	6
70	1	R	A	4	4
70	0	Q	A	7	7
700	0	Q	A	4	7
700	0	S	A	5	8
701	0	R	B	4	6
701	1	Q	B	4	6
701	1	S	B	4	7
702	0	S	A	3	4
703	0	Q	A	3	7
703	1	R	A	4	3
703	0	S	A	5	5
704	1	Q	B	6	7
704	1	S	B	7	8
705	1	R	A	5	7
705	0	S	A	5	8
706	0	Q	A	4	5
707	1	R	A	2	3
707	0	Q	A	5	7
707	0	S	A	4	1
708	1	R	A	5	3
708	0	S	A	3	6
710	1	R	A	6	6
710	0	S	A	4	5
710	0	Q	A	5	3
711	1	R	A	6	7
711	0	Q	A	5	8
712	1	S	B	4	1
712	1	Q	B	3	4
712	0	R	B	3	5
713	0	Q	A	6	8
715	1	R	A	6	7
715	0	S	A	7	6
716	0	Q	A	6	8
716	1	R	A	7	7
716	0	S	A	5	8
717	1	R	A	3	5
717	0	S	A	1	1
718	0	Q	A	5	7
718	1	R	A	5	7
719	0	R	B	5	6
72	1	Q	B	7	8
72	1	S	B	6	7
72	0	R	B	6	8
720	1	S	B	4	8
721	0	R	B	5	4
722	1	Q	B	3	4
723	1	Q	B	3	1
724	1	S	B	6	7
724	0	R	B	6	8
724	1	Q	B	7	8
725	1	R	A	4	6
725	0	S	A	6	8
726	0	R	B	4	6
726	1	Q	B	5	8
727	0	R	B	5	4
727	1	S	B	7	8
728	0	R	B	6	7
73	0	S	A	2	4
730	0	S	A	6	8
730	1	R	A	5	6
730	0	Q	A	6	7
731	1	Q	B	6	5
731	1	S	B	5	8
731	0	R	B	5	4
732	1	Q	B	3	5
732	0	R	B	3	6
733	1	S	B	2	4
733	1	Q	B	3	7
734	1	S	B	6	7
735	0	Q	A	7	7
735	1	R	A	5	5
736	0	Q	A	7	7
736	1	R	A	5	5
738	0	S	A	2	3
738	0	Q	A	5	8
738	1	R	A	5	3
739	1	Q	B	6	7
739	0	R	B	5	6
74	0	S	A	4	5
74	1	R	A	4	6
74	0	Q	A	7	8
740	1	R	A	5	6
741	0	R	B	2	8
742	1	S	B	6	6
742	0	R	B	5	5
743	1	S	B	7	8
743	1	Q	B	6	7
743	0	R	B	6	7
744	0	Q	A	5	1
745	1	S	B	3	7
745	0	R	B	3	8
746	1	Q	B	4	5
746	1	S	B	5	6
748	0	Q	A	7	7
749	0	R	B	4	4
749	1	Q	B	6	8
75	0	Q	A	6	7
750	1	Q	B	1	8
750	1	S	B	7	8
751	1	S	B	3	4
753	0	R	B	4	2
754	1	Q	B	6	8
754	0	R	B	6	8
755	0	S	A	3	2
756	0	Q	A	6	7
756	1	R	A	2	4
757	1	S	B	4	8
758	0	R	B	7	6
758	1	S	B	6	8
759	1	S	B	8	7
76	1	S	B	4	8
760	0	R	B	2	5
762	1	R	A	2	3
762	0	Q	A	6	6
763	1	S	B	5	6
764	1	Q	B	6	8
764	0	R	B	5	5
764	1	S	B	7	8
765	0	S	A	1	7
765	0	Q	A	3	6
765	1	R	A	6	7
766	0	R	B	3	4
767	1	S	B	5	7
767	1	Q	B	4	7
768	1	R	A	5	6
769	0	Q	A	5	4
769	1	R	A	4	6
769	0	S	A	3	4
77	0	S	A	1	5
77	0	Q	A	4	7
770	1	Q	B	3	4
770	1	S	B	1	1
771	1	S	B	6	6
771	0	R	B	6	6
771	1	Q	B	7	8
772	0	S	A	7	8
772	0	Q	A	2	6
773	1	R	A	2	2
773	0	S	A	1	3
774	1	R	A	5	4
774	0	Q	A	5	8
776	0	R	B	1	3
776	1	S	B	2	2
78	0	Q	A	4	3
79	0	R	B	3	3
79	1	S	B	4	7
8	1	S	B	3	5
82	1	Q	B	4	4
82	0	R	B	5	5
83	1	R	A	6	6
84	0	Q	A	1	1
84	1	R	A	2	3
85	1	R	A	3	5
85	0	S	A	3	6
86	1	R	A	4	5
86	0	S	A	3	1
89	1	Q	B	5	5
89	0	R	B	6	4
89	1	S	B	4	6
9	1	Q	B	5	5
91	1	S	B	4	6
91	1	Q	B	8	8
91	0	R	B	4	6
92	0	R	B	2	5
93	1	S	B	2	4
94	1	S	B	6	7
94	1	Q	B	4	7
96	0	Q	A	1	2
97	0	Q	A	5	6
97	0	S	A	4	6
98	0	Q	A	2	3
99	0	R	B	3	3
99	1	S	B	3	1
99	1	Q	B	5	2
